# Supplementary material
Source: ML conference proceedings conference paper supplement (https://proceedings.neurips.cc/paper_files/paper/2014/hash/41a60377ba920919939d83326ebee5a1-Abstract.html)
Supplement: Supplementary file 1 [file 41a60377ba920919939d83326ebee5a1-Supplemental.zip]

---

# Real-Time Decoding of an Integrate and Fire Encoder

---

Shreya Saxena and Munther Dahleh

Department of Electrical Engineering and Computer Sciences  
Massachusetts Institute of Technology  
Cambridge, MA 02139  
{ssaxena, dahleh}@mit.edu

## Appendix

We present Theorem 2 in the main text again, and provide the proof here.

**Theorem 2.** *Real-time reconstruction: Given a signal  $f \in \mathcal{L}_{2,\beta}^\Omega$  passed through an IAF encoder with known thresholds, and given that the spikes satisfy a certain minimum density  $\sup_{i \in \mathbb{Z}} (t_{i+1} - t_i) = \delta$  for some  $\delta < \frac{\Omega}{\pi}$ , we can construct a causal real-time decoder that reconstructs a function  $\tilde{f}_t(t)$  using the recursive algorithm in Equations 11 and 12, s.t.*

$$|f(t) - \tilde{f}_t(t)| \leq \frac{c}{1 - \frac{\delta\Omega}{\pi}} \|f\|_{2,\beta} (1+t)^{-\beta} \quad (1)$$

, where  $c$  depends only on  $\delta$ ,  $\Omega$  and  $\beta$ .

Moreover, if we use a finite number of iterations  $K$  at every step, we obtain the following error:

$$|f(t) - \tilde{f}_t^K(t)| \leq c \frac{1 - \left(\frac{\delta\Omega}{\pi}\right)^{K+1}}{1 - \frac{\delta\Omega}{\pi}} \|f\|_{2,\beta} (1+t)^{-\beta} + \left(\frac{\delta\Omega}{\pi}\right)^{K+1} \frac{1 + \frac{\delta\Omega}{\pi}}{1 - \frac{\delta\Omega}{\pi}} \|f\|_2 \quad (2)$$

*Proof.* We start with a few preliminaries, and the definition of a constant  $c$  that will be used later in the proof. These preliminary notions are also provided in [1]. We define a local maximum function on  $f$ :

$$f^\#(t) = \sup_{|u| \leq \delta} |f(t+u)| \quad (3)$$

Note the following two properties of  $f^\#(t)$  for  $f \in \mathcal{L}_{2,\beta}^\Omega$ , with a function  $p_\alpha(t)$  such that  $\hat{p}_\alpha(\omega) = 1$  for  $\omega \in [-\Omega, \Omega]$ , and  $p_\alpha \in \mathcal{L}_{1,\alpha}$ , for some  $\alpha \geq \beta$ . Here,  $*$  denotes the convolution operator.

$$\left| \sum_{i=1}^{\infty} f(s_i) \mathbb{1}_{[t_i, t_{i+1}]}(t) \right| \leq f^\#(t) \text{ pointwise} \quad (4)$$

$$f^\#(t) = (f * p_\alpha)^\#(t) \leq (|f| * p_\alpha^\#)(t) \quad (5)$$

As a consequence of equation (5), we obtain the following bound on the  $\mathcal{L}_{2,\beta}$  norm of the local maximum function (3), using a function  $p_\alpha(t)$  as described above.

$$\|f^\#\|_{2,\beta} \leq \inf_{p_\alpha} \|p_\alpha^\#\|_{1,\alpha} \|f\|_{2,\beta} \quad (6)$$

We denote  $\inf_{p_\alpha} \|p_\alpha^\#\|_{1,\alpha}$  for some  $\alpha \geq \beta$  by  $c$ , which depends only on  $\delta$ ,  $\Omega$  and  $\beta$ .

We now bound the  $\mathcal{L}_2$  norm of the error incurred using a decoder acting on all the spikes in a finite time period  $T$ , i.e.  $\{t_i\}_{i:|t_i| \leq T}$ , and show that this error is decaying in  $T$ .

We consider that after the first approximation  $\mathcal{A}_T f$  with a finite number of spikes, we can construct  $\{t_i\}_{i:|t_i| > T}$  such that  $\sup_{i:|t_i| > T} (t_{i+1} - t_i)$  is less than the required  $\delta$ . Thus we can construct an

operator  $\mathcal{A}$  as long as it is not acting directly on  $f$ , where  $\mathcal{A}$  is defined as in Theorem 1 in the main text. The adjoint operators of  $\mathcal{A}$  and  $\mathcal{A}_T$  for  $f \in \mathcal{L}_2^\Omega$  are  $\mathcal{A}^*$  and  $\mathcal{A}_T^*$  respectively.

$$\mathcal{A}^* f = \sum_{i \in \mathbb{Z}} f(s_i) (\text{sinc}_\Omega * \mathbb{1}_{[t_i, t_{i+1}]}) \quad (7)$$

$$\mathcal{A}_T^* f = \sum_{i: |t_i| \leq T} f(s_i) (\text{sinc}_\Omega * \mathbb{1}_{[t_i, t_{i+1}]}) \quad (8)$$

Equation 7 is shown in [2], and Equation 8 follows similarly.

We first define  $\tilde{f}_T$  as the result of the following iteration, i.e.  $\tilde{f}_T = \lim_{k \rightarrow \infty} \tilde{f}_T^k$ .

$$\tilde{f}_T^0 = \mathcal{A}_T f \quad (9)$$

$$\tilde{f}_T^1 = (I - \mathcal{A}) \tilde{f}_T^0 + \mathcal{A}_T f = (I - \mathcal{A}) \mathcal{A}_T f + \mathcal{A}_T f \quad (10)$$

$$\tilde{f}_T^k = (I - \mathcal{A}) \tilde{f}_T^{k-1} + \mathcal{A}_T f = \sum_{n=0}^k (I - \mathcal{A})^n \mathcal{A}_T f \quad (11)$$

To derive  $\|f - \tilde{f}_T\|_2$  for  $f \in \mathcal{L}_2^\Omega$ , we first note that the error incurred using a finite number of spikes is the same as the error in the adjoint space, i.e.  $\|f - \tilde{f}_T\|_2 = \|f - \sum_{n=0}^\infty (I - \mathcal{A})^n \mathcal{A}_T f\|_2 = \|f - \sum_{n=0}^\infty (I - \mathcal{A}^*)^n \mathcal{A}_T^* f\|_2$

We can thus work exclusively with the adjoint operators  $\mathcal{A}^* f$  and  $\mathcal{A}_T^* f$  in order to derive  $\|f - \tilde{f}_T\|_2$  [3].

$$\|f - \tilde{f}_T\|_2 = \left\| \sum_{n=0}^\infty (I - \mathcal{A}^*)^n (\mathcal{A}^* f - \mathcal{A}_T^* f) \right\|_2 \quad (12)$$

$$\leq \sum_{n=0}^\infty \|(I - \mathcal{A}^*)^n (\mathcal{A}^* f - \mathcal{A}_T^* f)\|_2 \quad (13)$$

$$\leq \sum_{n=0}^\infty \left(\frac{\delta\Omega}{\pi}\right)^{n+1} \|\mathcal{A}^* f - \mathcal{A}_T^* f\|_2 \quad (14)$$

$$= \frac{1}{1 - \frac{\delta\Omega}{\pi}} \left\| \sum_{i: |t_i| > T} f(s_i) \mathbb{1}_{[t_i, t_{i+1}]} * \text{sinc}_\Omega \right\|_2 \quad (15)$$

$$\leq \frac{1}{1 - \frac{\delta\Omega}{\pi}} \left\| \sum_{i: |t_i| > T} f(s_i) \mathbb{1}_{[t_i, t_{i+1}]} \right\|_2 \quad (16)$$

$$\leq \frac{1}{1 - \frac{\delta\Omega}{\pi}} \|f^\# \mathbb{1}_{\mathbb{R} \setminus [-T, T]}\|_2 \quad (\text{using (5)}) \quad (17)$$

$$= \frac{1}{1 - \frac{\delta\Omega}{\pi}} \|f^\# \mathbb{1}_{\mathbb{R} \setminus [-T, T]} (1 + |t|)^\beta (1 + |t|)^{-\beta}\|_2 \quad (18)$$

$$\leq \frac{1}{1 - \frac{\delta\Omega}{\pi}} \|f^\#\|_{2, \beta} \sup_{t \in \mathbb{R} \setminus [-T, T]} (1 + |t|)^{-\beta} \quad (19)$$

$$\leq \frac{c}{1 - \frac{\delta\Omega}{\pi}} \|f\|_{2, \beta} (1 + T)^{-\beta} \quad (\text{using (6)}) \quad (20)$$

, where  $c$  depends only on  $\delta, \Omega$  and  $\beta$ .

Now, only using a finite number of iterations, we have the following error bound.

$$\|f - \tilde{f}_T^K\|_2 = \left\| \sum_{n=0}^\infty (I - \mathcal{A}^*)^n \mathcal{A}^* f - \sum_{n=0}^K (I - \mathcal{A}^*)^n \mathcal{A}_T^* f \right\|_2 \quad (21)$$

$$\leq \left\| \sum_{n=0}^K (I - \mathcal{A}^*)^n (\mathcal{A}^* f - \mathcal{A}_T^* f) \right\|_2 + \left\| \sum_{n=K+1}^\infty (I - \mathcal{A}^*)^n \mathcal{A}^* f \right\|_2 \quad (22)$$

$$\leq c \frac{1 - \left(\frac{\delta\Omega}{\pi}\right)^{K+1}}{1 - \frac{\delta\Omega}{\pi}} \|f\|_{2, \beta} (1 + T)^{-\beta} + \left(\frac{\delta\Omega}{\pi}\right)^{K+1} \frac{1 + \frac{\delta\Omega}{\pi}}{1 - \frac{\delta\Omega}{\pi}} \|f\|_2 \quad (23)$$

We now construct  $\tilde{f}_t(t)$  using spikes  $\{t_i\}_{i:|t_i|\leq t}$  at every time  $t$ . Thus, at every time  $t$ , we have a causal decoder that uses all spikes that have already occurred. We bound the error at every time  $t$  as the following.

$$|f(t) - \tilde{f}_t(t)| \leq \sup_{\tau \in \mathbb{R}} |f(\tau) - \tilde{f}_t(\tau)| \quad (24)$$

$$\leq \|f - \tilde{f}_t\|_2 \quad (25)$$

$$\leq \frac{c}{1 - \frac{\delta\Omega}{\pi}} \|f\|_{2,\beta} (1+t)^{-\beta} \quad (26)$$

Here, we used the fact that  $\|x\|_\infty \leq \|x\|_2 \forall x \in \mathcal{L}_2$  for the inequality in Equation 25, and Equation 20 for the inequality in Equation 26. The proof for Equation 2 follows similarly from Equation 23. We note that as a new spike  $t_{i+1}$  arrives, we can calculate the new estimate as a function of the old estimate due to the following.

$$\tilde{f}_{t_{i+1}}^0 = \mathcal{A}_{t_{i+1}} f = \mathcal{A}_{t_i} f + \left( \int_{t_i}^{t_{i+1}} f(\tau) d\tau \right) \text{sinc}(t - s_i) = \tilde{f}_{t_i}^0 + g_{t_{i+1}}^0 \quad (27)$$

We can carry the term  $g_{t_{i+1}}^0$  forward, and track its effect on future iterations to calculate  $g_{t_{i+1}}^k$  as a function of  $g_{t_{i+1}}^{k-1}$ , to obtain Equation 12 in the main text.  $\square$

## References

- [1] H. G. Feichtinger and K. Gröchenig, “Irregular sampling theorems and series expansions of band-limited functions,” *Journal of mathematical analysis and applications*, vol. 167, no. 2, pp. 530–556, 1992.
- [2] —, “Theory and practice of irregular sampling,” *Wavelets: mathematics and applications*, vol. 1994, pp. 305–363, 1994.
- [3] P. Butzer, H. G. Feichtinger, and K. Gröchenig, “Error analysis in regular and irregular sampling theory,” *Applicable Analysis*, vol. 50, no. 3-4, pp. 167–189, 1993.
