# Supplementary material
Source: ML conference proceedings conference paper supplement (https://proceedings.neurips.cc/paper_files/paper/2014/hash/41a60377ba920919939d83326ebee5a1-Abstract.html)
Supplement: Supplementary file 2 [file 41a60377ba920919939d83326ebee5a1-Supplemental.zip]

Archive with 1 entries (1 files):
- NIPS_Appendix.pdf
